# Retraction: ARHGAP24 inhibits cell cycle progression, induces apoptosis and suppresses invasion in renal cell carcinoma

Gaosi Xu<sup>1,\*</sup>, Xiongbing Lu<sup>2,\*</sup>, Tianlun Huang<sup>1</sup> and Jie Fan<sup>1</sup>

<sup>1</sup>Department of Nephrology, The Second Affiliated Hospital of Nanchang University, Nanchang, China

<sup>2</sup>Department of Urology, The Second Affiliated Hospital of Nanchang University, Nanchang, China

\*These authors have contributed equally to this work

**Published:** June 17, 2025

**Copyright:** © 2025 Xu et al. This is an open access article distributed under the terms of the [Creative Commons Attribution License](#) (CC BY 4.0), which permits unrestricted use, distribution, and reproduction in any medium, provided the original author and source are credited.

**This article has been retracted:** This decision follows an investigation by Oncotarget into concerns raised by a third party. Our Image Forensics analysis found that the GAPDH Western blot image in Figure 2D was previously used as a loading control in Figure 2C in an unrelated paper [1]. The Western blot for CDK2 in Figure 3F was earlier published as an MMP 2 blot in Figure 4C [2] and as a b-catenin blot in Figure 4C [3] of unrelated papers that have already been retracted [2, 3]. In addition, Figure 5B contains an invasion image of Caki-2 cells (renal cell carcinoma) that was also found in an earlier published paper [4] in Figure 6C, where it presented transwell assay data for ECA-109 human esophageal carcinoma cells. Furthermore, several images from this paper have been subsequently used in publications by different research groups in other journals. The corresponding author, Gaosi Xu, has acknowledged these duplications and requested a retraction. While multiple attempts were made to contact the other authors for their acknowledgment of this retraction, no responses were received. Consequently, based on these findings and the corresponding author's request, the Editorial decision has been made to retract this paper.

Original article: Oncotarget. 2016; 7:51829–51839. <https://doi.org/10.18632/oncotarget.10386>

## REFERENCES

1. Zheng L, Chen L, Zhang X, Zhan J, Chen J. TMEM49-related apoptosis and metastasis in ovarian cancer and regulated cell death. Mol Cell Biochem. 2016; 416:1–9. <https://doi.org/10.1007/s11010-016-2684-3>. [PubMed]
2. Zhang Q, Chen X, Zhang X, Zhan J, Chen J. Knockdown of TMEM14A expression by RNAi inhibits the proliferation and invasion of human ovarian cancer cells. Biosci Rep. 2016; 36:e00298. <https://doi.org/10.1042/BSR20150258>. [PubMed]. Retraction in: Biosci Rep. 2023; 43:BSR-2015-0258\_RET. [https://doi.org/10.1042/BSR-2015-0258\\_RET](https://doi.org/10.1042/BSR-2015-0258_RET). [PubMed]
3. Zhu Z, Wang Y, Zhang C, Yu S, Zhu Q, Hou K, Yan B. TRIM25 blockade by RNA interference inhibited migration and invasion of gastric cancer cells through TGF- $\beta$  signaling. Sci Rep. 2016; 6:19070. <https://doi.org/10.1038/srep19070>. [PubMed]. Retraction in: Sci Rep. 2023; 13:5564. <https://doi.org/10.1038/s41598-023-32830-y>. [PubMed]
4. Tantai JC, Zhang Y, Zhao H. Heterophyllin B inhibits the adhesion and invasion of ECA-109 human esophageal carcinoma cells by targeting PI3K/AKT/ $\beta$ -catenin signaling. Mol Med Rep. 2016; 13:1097–104. <https://doi.org/10.3892/mmr.2015.4659>. [PubMed]
